# Supplementary material
Source: Springer Nature journal article supplement (https://www.springermedizin.de/resource/supplementary/12982_2007_65_MOESM1_ESM.pdf/9604378)
Supplement: MOESM1 [file 9604378]

**ANNEX 1**  
**LIST OF JOURNALS INDEXED IN IMEMR**  
**JOURNALS INDEXED IN MEDLINE AND/OR EMABSE ARE MARKED (√)**

| No | INDEXED IN MEDLINE | INDEXED IN EMABSE | ISSN                | Journal Title                                                          | Country                  |
|----|--------------------|-------------------|---------------------|------------------------------------------------------------------------|--------------------------|
| 1  | X                  | X                 | 1687-1693           | AAMJ - Al-Azhar Assiut Medical Journal                                 | EGYPT                    |
| 2  | X                  | X                 | 1683-8068           | ACES - Actualites Cliniques et Scientifiques                           | LEBANON                  |
| 3  | √                  | X                 | 0044-6025           | Acta Medica Iranica                                                    | ISLAMIC REPUBLIC OF IRAN |
| 4  | X                  | X                 | 1561-4174           | Advances in Cognitives Sciences                                        | ISLAMIC REPUBLIC OF IRAN |
| 5  | X                  | X                 | 1687-224X           | Afro - Arab Liver Journal                                              | EGYPT                    |
| 6  | X                  | X                 | 1687-1030           | Ain-Shams Journal of Forensic Medicine and Clinical Toxicology         | EGYPT                    |
| 7  | √                  | X                 | 0002-2144           | Ain-Shams Medical Journal                                              | EGYPT                    |
| 8  | X                  | X                 | N/A                 | AJAIC - Alexandria Journal of Anaesthesia and Insentive Care           | EGYPT                    |
| 9  | √                  | X                 | 1110-0400           | Al Azhar Medical Journal                                               | EGYPT                    |
| 10 | X                  | X                 | N/A                 | Al-Azhar Journal of Dental Science                                     | EGYPT                    |
| 11 | √                  | X                 | 1110-015X           | Alexandria Dental Journal                                              | EGYPT                    |
| 12 | X                  | X                 | N/A                 | Alexandria Journal of Food Science and Technology                      | EGYPT                    |
| 13 | X                  | X                 | N/A                 | Alexandria Journal of Pediatrics                                       | EGYPT                    |
| 14 | √                  | X                 | 1110-1792           | Alexandria Journal of Pharmaceutical Sciences                          | EGYPT                    |
| 15 | X                  | X                 | 1110-2047           | Alexandria Journal of Veterinary Science                               | EGYPT                    |
| 16 | √                  | X                 | 0516-5849           | Alexandria Medical Journal [The]                                       | EGYPT                    |
| 17 | X                  | X                 | 1810-9543           | Al-Kindy College Medical Journal                                       | IRAQ                     |
| 18 | X                  | X                 | N/A                 | Al-Majallah Al-Tibbiya Al-Arabiayh                                     | SYRIAN ARAB REPUBLIC     |
| 19 | X                  | X                 | 1815-0993           | Almustansiriya Journal of Pharmaceutical Sciences                      | IRAQ                     |
| 20 | X                  | X                 | N/A                 | Al-Quds Medical Journal                                                | PALESTIN                 |
| 21 | X                  | X                 | 1563-3241           | Annals Abbassi Shaheed Hospital and Karachi Medical and Dental College | PAKISTAN                 |
| 22 | X                  | X                 | 1815-2643<br>Online | Annals of Alquds Medicine                                              | PALESTIN                 |
| 23 | X                  | X                 | N/A                 | Annals of Jinnah Postgraduate Medical Centre - Karachi                 | PAKISTAN                 |
| 24 | X                  | X                 | 1684-6680           | Annals of King Edward Medical College                                  | PAKISTAN                 |

| No | INDEXED IN MEDLINE | INDEXED IN EMBASE | ISSN      | Journal Title                                            | Country                  |
|----|--------------------|-------------------|-----------|----------------------------------------------------------|--------------------------|
| 25 | X                  | X                 | 1687-4137 | Annals of Pediatric Surgery                              | EGYPT                    |
| 26 | √                  | √                 | 0256-4947 | Annals of Saudi Medicine                                 | SAUDI ARABIA             |
| 27 | X                  | X                 | 0027-1446 | Annals of the College of Medicine - Mosul                | IRAQ                     |
| 28 | X                  | √                 | 1817-1737 | Annals of Thoracic Medicine                              | SAUDI ARABIA             |
| 29 | X                  | X                 | N/A       | Arab Dental Journal                                      | LEBANON                  |
| 30 | X                  | X                 | 1608-8352 | Arab Journal for Food and Nutrition                      | BAHRAIN                  |
| 31 | √                  | X                 | 1110-6875 | Arab Journal of Biotechnology                            | EGYPT                    |
| 32 | X                  | X                 | 1110-1822 | Arab Journal of Laboratory Medicine [The]                | EGYPT                    |
| 33 | X                  | X                 | 1683-0369 | Arab Journal of Pharmaceutical Sciences                  | SYRIAN ARAB REPUBLIC     |
| 34 | X                  | X                 | 1016-8923 | Arab Journal of Psychiatry [The]                         | JORDAN                   |
| 35 | X                  | X                 | N/A       | Arabic Journal of Forensic Medicine and Criminal Science | SYRIAN ARAB REPUBLIC     |
| 36 | √                  | X                 | 0020-2509 | Archives de l'Institut Pasteur de Tunis                  | TUNISIA                  |
| 37 | √                  | √                 | 1029-2977 | Archives of Iranian Medicine                             | ISLAMIC REPUBLIC OF IRAN |
| 38 | X                  | X                 | 1728-6506 | Armaghane-danesh                                         | ISLAMIC REPUBLIC OF IRAN |
| 39 | X                  | X                 | 1735-3955 | ARYA Therosclerosis                                      | ISLAMIC REPUBLIC OF IRAN |
| 40 | X                  | X                 | 1687-2193 | ASJOG - Ain Shams Journal of Obstetrics and Gynecology   | EGYPT                    |
| 41 | X                  | X                 | N/A       | ASNJ - Alexandria Scientific Nursing Journal             | EGYPT                    |
| 42 | X                  | X                 | 1110-0494 | Assiut Medical Journal                                   | EGYPT                    |
| 43 | X                  | X                 | 1735-1936 | Audiology                                                | ISLAMIC REPUBLIC OF IRAN |
| 44 | X                  | √                 | 1012-8298 | Bahrain Medical Bulletin                                 | BAHRAIN                  |
| 45 | X                  | X                 | N/A       | Basrah Journal of Surgery                                | IRAQ                     |
| 46 | X                  | X                 | 1110-208X | Benha Medical Journal                                    | EGYPT                    |
| 47 | X                  | X                 | 1026-6399 | Bina Journal of Ophthalmology                            | ISLAMIC REPUBLIC OF IRAN |
| 48 | X                  | X                 | N/A       | Biomedica                                                | PAKISTAN                 |
| 49 | X                  | X                 | 1027-9520 | Blood                                                    | ISLAMIC REPUBLIC OF IRAN |
| 50 | X                  | X                 | 0851-8238 | Bulletin epidemiologique                                 | MOROCCO                  |
| 51 | √                  | X                 | 1110-0834 | Bulletin of Alexandria Faculty of Medicine               | EGYPT                    |

| No | INDEXED IN MEDLINE | INDEXED IN EMBASE | ISSN      | Journal Title                                                               | Country                  |
|----|--------------------|-------------------|-----------|-----------------------------------------------------------------------------|--------------------------|
| 52 | X                  | X                 | N/A       | Bulletin of Alexandria Thoracic Association                                 | EGYPT                    |
| 53 | √                  | X                 | 0007-4845 | Bulletin of Endemic Diseases - Baghdad                                      | IRAQ                     |
| 54 | X                  | X                 | 1110-0931 | Bulletin of Faculty of Pharmacy - Cairo University                          | EGYPT                    |
| 55 | X                  | X                 | 1110-6611 | Bulletin of Faculty of Physical Therapy - Cairo University                  | EGYPT                    |
| 56 | √                  | X                 | 1110-0036 | Bulletin of High Institute of Public Health                                 | EGYPT                    |
| 57 | X                  | X                 | 1110-0052 | Bulletin of Pharmaceutical Sciences - Assiut University                     | EGYPT                    |
| 58 | X                  | X                 | 0568-9619 | Bulletin of the Faculty of Science - University of Alexandria               | EGYPT                    |
| 59 | X                  | X                 | N/A       | Bulletin of the Kuwait Institute for Medical Specialization                 | KUWAIT                   |
| 60 | X                  | X                 | N/A       | Bulletin of the National Nutrition Institute of the Arab Republic of Egypt  | EGYPT                    |
| 61 | X                  | X                 | 1110-0591 | Bulletin of the National Research Centre                                    | EGYPT                    |
| 62 | √                  | X                 | 1110-0982 | Bulletin of the Ophthalmological Society of Egypt                           | EGYPT                    |
| 63 | X                  | X                 | 0300-5291 | Cahier Medicaux de Tunisie                                                  | TUNISIA                  |
| 64 | X                  | X                 | 0528-7944 | Challenge - Quarterly [The]                                                 | PAKISTAN                 |
| 65 | X                  | X                 | 1110-8681 | Childhood and Development                                                   | EGYPT                    |
| 66 | X                  | √                 | 0891-8929 | Clinical Diabetes                                                           | EGYPT                    |
| 67 | X                  | X                 | 0301-7265 | Community Medicine                                                          | PAKISTAN                 |
| 68 | √                  | X                 | N/A       | Damascus University Journal for Health Sciences                             | SYRIAN ARAB REPUBLIC     |
| 69 | X                  | √                 | 1560-8115 | DARU - Journal of Faculty of Pharmacy Tehran University of Medical Sciences | ISLAMIC REPUBLIC OF IRAN |
| 70 | X                  | X                 | 1369-7501 | Diabetes Digest                                                             | PAKISTAN                 |
| 71 | √                  | X                 | 1026-3772 | Dirasat                                                                     | JORDAN                   |
| 72 | X                  | X                 | 1735-3327 | DRJ - Dental Research Journal                                               | ISLAMIC REPUBLIC OF IRAN |
| 73 | X                  | X                 | 1040-2312 | Eastern Mediterranean Region Drugs Digest                                   | EGYPT                    |
| 74 | X                  | X                 | 1014-2347 | Eastern Mediterranean Region Epidemiological Bulletin                       | EGYPT                    |
| 75 | √                  | X                 | 0070-9484 | EDJ - Egyptian Dental Journal                                               | EGYPT                    |
| 76 | X                  | X                 | 1110-2144 | Egyptian Journal of Anatomy [The]                                           | EGYPT                    |
| 77 | X                  | X                 | 1012-5558 | Egyptian Journal of Biomedical Engineering                                  | EGYPT                    |
| 78 | X                  | X                 | 1110-8525 | Egyptian Journal of Biophysics and Biomedical Engineering                   | EGYPT                    |
| 79 | X                  | X                 | 0449-2285 | Egyptian Journal of Chemistry                                               | EGYPT                    |
| 80 | X                  | X                 | 1110-1865 | Egyptian Journal of Community Medicine                                      | EGYPT                    |

| No  | INDEXED IN MEDLINE | INDEXED IN EMBASE | ISSN      | Journal Title                                                           | Country |
|-----|--------------------|-------------------|-----------|-------------------------------------------------------------------------|---------|
| 81  | X                  | X                 | 1110-7650 | Egyptian Journal of Dermatology and Andrology                           | EGYPT   |
| 82  | X                  | X                 | N/A       | Egyptian Journal of Diabetes [The]                                      | EGYPT   |
| 83  | X                  | X                 | 1110-0613 | Egyptian Journal of Food Science                                        | EGYPT   |
| 84  | √                  | X                 | 0046-161X | Egyptian Journal of Genetics and Cytology                               | EGYPT   |
| 85  | √                  | X                 | 1110-0559 | Egyptian Journal of Histology [The]                                     | EGYPT   |
| 86  | X                  | X                 | N/A       | Egyptian Journal of Hospital Medicine [The]                             | EGYPT   |
| 87  | X                  | X                 | 1110-8630 | Egyptian Journal of Medical Human Genetics [The]                        | EGYPT   |
| 88  | X                  | X                 | 1110-5593 | Egyptian Journal of Medical Laboratory Sciences                         | EGYPT   |
| 89  | X                  | X                 | 1110-2179 | Egyptian Journal of Medical Microbiology                                | EGYPT   |
| 90  | X                  | X                 | 0022-2704 | Egyptian Journal of Microbiology                                        | EGYPT   |
| 91  | X                  | X                 | N/A       | Egyptian Journal of Neonatology [The]                                   | EGYPT   |
| 92  | X                  | X                 | N/A       | Egyptian Journal of Nutrition                                           | EGYPT   |
| 93  | √                  | X                 | 0258-7556 | Egyptian Journal of Occupational Medicine                               | EGYPT   |
| 94  | X                  | X                 | 0301-5068 | Egyptian Journal of Pharmaceutical Sciences [The]                       | EGYPT   |
| 95  | X                  | X                 | 0301-8660 | Egyptian Journal of Physiological Sciences                              | EGYPT   |
| 96  | X                  | X                 | 1110-1105 | Egyptian Journal of Psychiatry [The]                                    | EGYPT   |
| 97  | X                  | X                 | 1110-7278 | Egyptian Journal of Schistosomiasis and Infectious and Endemic Diseases | EGYPT   |
| 98  | X                  | X                 | 1110-1121 | Egyptian Journal of Surgery [The]                                       | EGYPT   |
| 99  | X                  | X                 | 1110-5712 | Egyptian Journal of Urology                                             | EGYPT   |
| 100 | X                  | X                 | 1110-0222 | Egyptian Journal of Veterinary Science                                  | EGYPT   |
| 101 | X                  | X                 | 1687-1278 | Egyptian Medical Journal of the National Research Center                | EGYPT   |
| 102 | X                  | X                 | N/A       | Egyptian Orthodontic Journal                                            | EGYPT   |
| 103 | X                  | X                 | 1110-1148 | Egyptian Orthopaedic Journal [The]                                      | EGYPT   |
| 104 | X                  | X                 | 0013-2438 | Egyptian Pharmaceutical Journal [National Research Center]              | EGYPT   |
| 105 | √                  | X                 | N/A       | Egyptian Population and Family Planning Review [The]                    | EGYPT   |
| 106 | X                  | X                 | 1110-161X | Egyptian Rheumatology and Rehabilitation                                | EGYPT   |
| 107 | X                  | X                 | 1687-3815 | Egyptian Science Magazine [The]                                         | EGYPT   |

| No  | INDEXED IN MEDLINE | INDEXED IN EMBASE | ISSN      | Journal Title                                                                          | Country                  |
|-----|--------------------|-------------------|-----------|----------------------------------------------------------------------------------------|--------------------------|
| 108 | √                  | X                 | 1687-1502 | EJB - Egyptian Journal of Biochemistry and Molecular Biology                           | EGYPT                    |
| 109 | X                  | X                 | N/A       | EJENTAS - Egyptian Journal of ENT and Allied Sciences                                  | EGYPT                    |
| 110 | X                  | X                 | 1110-2446 | El-Minia Medical Bulletin                                                              | EGYPT                    |
| 111 | √                  | √                 | 1020-3397 | EMHJ - Eastern Mediterranean Health Journal                                            | EGYPT                    |
| 112 | X                  | √                 | 0250-6882 | Emirates Medical Journal                                                               | UNITED ARAB EMIRATES     |
| 113 | √                  | X                 | 1110-0095 | EMJ - Egyptian Medical Journal [The]                                                   | EGYPT                    |
| 114 | X                  | X                 | 0254-7198 | Garyounis Medical Journal                                                              | LYBIAN ARAB JAMAHIRIYA   |
| 115 | √                  | X                 | 1110-6638 | Gazette of the Egyptian Paediatric Association [The]                                   | EGYPT                    |
| 116 | X                  | X                 | N/A       | Gezira Journal of Health Sciences                                                      | SUDAN                    |
| 117 | X                  | X                 | 1819-7973 | GJMS – Gomal Journal of Medical Sciences                                               | PAKISTAN                 |
| 118 | X                  | X                 | 1560-7186 | Govaresh                                                                               | ISLAMIC REPUBLIC OF IRAN |
| 119 | X                  | X                 | N/A       | Gulf Journal of Dermatology and Venereology [The]                                      | QATAR                    |
| 120 | X                  | X                 | 1561-252X | HAKIM Research Journal                                                                 | ISLAMIC REPUBLIC OF IRAN |
| 121 | √                  | X                 | 0250-7188 | Hamdard Medicus                                                                        | PAKISTAN                 |
| 122 | X                  | X                 | 1735-2215 | HAYAT - The Journal of Faculty of Nursing and Midwifery                                | ISLAMIC REPUBLIC OF IRAN |
| 123 | X                  | X                 | 1735-1847 | Health Information Management                                                          | ISLAMIC REPUBLIC OF IRAN |
| 124 | X                  | X                 | 1014-9899 | Health Services Journal of the Eastern Mediterreanean Region                           | EGYPT                    |
| 125 | X                  | X                 | N/A       | Heart Views                                                                            | QATAR                    |
| 126 | X                  | X                 | 1735-143X | Hepatitis Monthly                                                                      | ISLAMIC REPUBLIC OF IRAN |
| 127 | √                  | √                 | 1028-852X | IBJ - Iranian Biomedical Journal                                                       | ISLAMIC REPUBLIC OF IRAN |
| 128 | X                  | X                 | N/A       | IDEES - Revue de Perfectionnement Medical et Paramedical                               | TUNISIA                  |
| 129 | X                  | X                 | 1735-4668 | IJCN - Iranian Journal of Child Neurology                                              | ISLAMIC REPUBLIC OF IRAN |
| 130 | X                  | X                 | 1683-4844 | IJEM - Iranian Journal of Endocrinology and Metabolism                                 | ISLAMIC REPUBLIC OF IRAN |
| 131 | X                  | X                 | 1735-1243 | IJHOBMT - International Journal of Hematology-Oncology and Bone Marrow Transplantation | ISLAMIC REPUBLIC OF IRAN |
| 132 | √                  | X                 | 1735-1383 | IJI - Iranian Journal of Immunology                                                    | ISLAMIC REPUBLIC OF IRAN |
| 133 | √                  | X                 | 1735-8582 | IJKD – Iranian Journal of Kidney Diseases                                              | ISLAMIC REPUBLIC OF IRAN |
| 134 | X                  | X                 | 1608-9359 | IJME - Iranian Journal of Medical Education                                            | ISLAMIC REPUBLIC OF IRAN |
| 135 | X                  | √                 | 0253-0716 | IJMS - Iranian Journal of Medical Sciences                                             | ISLAMIC REPUBLIC OF IRAN |

| No  | INDEXED IN MEDLINE | INDEXED IN EMBASE | ISSN      | Journal Title                                                   | Country                  |
|-----|--------------------|-------------------|-----------|-----------------------------------------------------------------|--------------------------|
| 136 | X                  | X                 | 1735-5087 | IJO - Iranian Journal of Orthodontics                           | ISLAMIC REPUBLIC OF IRAN |
| 137 | X                  | X                 | 1735-0328 | IJPR - Iranian Journal of Pharmaceutical Research               | ISLAMIC REPUBLIC OF IRAN |
| 138 | X                  | X                 | 0304-4564 | IMJ - Iraqi Medical Journal                                     | IRAQ                     |
| 139 | X                  | X                 | 1027-0299 | Infectious Disease Journal of Pakistan                          | PAKISTAN                 |
| 140 | X                  | √                 | 1606-7754 | International Journal of Diabetes and Metabolism                | UNITED ARAB EMIRATES     |
| 141 | X                  | X                 | 1726-9148 | International Journal of Endocrinology and Metabolism           | ISLAMIC REPUBLIC OF IRAN |
| 142 | X                  | X                 | 1735-6865 | International Journal of Environmental Research                 | ISLAMIC REPUBLIC OF IRAN |
| 143 | X                  | X                 | 1735-1472 | International Journal of Environmental Science and Technology   | ISLAMIC REPUBLIC OF IRAN |
| 144 | X                  | X                 | 1810-0155 | International Journal of Pathology                              | PAKISTAN                 |
| 145 | X                  | X                 | 1816-0581 | IOJ - Iraqi Orthodontic Journal                                 | IRAQ                     |
| 146 | X                  | X                 | 1608-8360 | IPMJ - Iraqi Postgraduate Medical Journal                       | IRAQ                     |
| 147 | X                  | X                 | 1735-8612 | Iran Journal of Medical Microbiology                            | ISLAMIC REPUBLIC OF IRAN |
| 148 | √                  | X                 | 1025-0581 | Iran Journal of Nursing                                         | ISLAMIC REPUBLIC OF IRAN |
| 149 | √                  | √                 | 1735-1502 | Iranian Journal of Allergy, Asthma and Immunology               | ISLAMIC REPUBLIC OF IRAN |
| 150 | X                  | X                 | 1735-7179 | Iranian Journal of Arthropod-Borne Diseases                     | ISLAMIC REPUBLIC OF IRAN |
| 151 | √                  | X                 | 1608-6015 | Iranian Journal of Basic Medical Sciences                       | ISLAMIC REPUBLIC OF IRAN |
| 152 | √                  | X                 | 1728-3043 | Iranian Journal of Biotechnology                                | ISLAMIC REPUBLIC OF IRAN |
| 153 | X                  | X                 | N/A       | Iranian Journal of Clinical Infectious Diseases                 | ISLAMIC REPUBLIC OF IRAN |
| 154 | X                  | X                 | 0021-082X | Iranian Journal of Dermatology                                  | ISLAMIC REPUBLIC OF IRAN |
| 155 | X                  | √                 | 1726-7544 | Iranian Journal of Diabetes and Lipid Disorders                 | ISLAMIC REPUBLIC OF IRAN |
| 156 | X                  | X                 | 1735-1979 | Iranian Journal of Environmental Health Science and Engineering | ISLAMIC REPUBLIC OF IRAN |
| 157 | X                  | X                 | N/A       | Iranian Journal of Epidemiology                                 | ISLAMIC REPUBLIC OF IRAN |
| 158 | √                  | X                 | 1735-8094 | Iranian Journal of Fertility and Sterility                      | ISLAMIC REPUBLIC OF IRAN |
| 159 | X                  | √                 | 1681-2824 | Iranian Journal of Nuclear Medicine                             | ISLAMIC REPUBLIC OF IRAN |
| 160 | X                  | X                 | N/A       | Iranian Journal of Obstetric, Gynecology and Infertility [The]  | ISLAMIC REPUBLIC OF IRAN |
| 161 | X                  | X                 | N/A       | Iranian Journal of Ophthalmic Research                          | ISLAMIC REPUBLIC OF IRAN |
| 162 | X                  | X                 | 1560-1293 | Iranian Journal of Otorhinolaryngology                          | ISLAMIC REPUBLIC OF IRAN |

| No  | INDEXED IN MEDLINE | INDEXED IN EMBASE | ISSN      | Journal Title                                                                     | Country                  |
|-----|--------------------|-------------------|-----------|-----------------------------------------------------------------------------------|--------------------------|
| 163 | X                  | X                 | 1735-7020 | Iranian Journal of Parasitology                                                   | ISLAMIC REPUBLIC OF IRAN |
| 164 | X                  | X                 | 1018-4406 | Iranian Journal of Pediatrics                                                     | ISLAMIC REPUBLIC OF IRAN |
| 165 | X                  | X                 | 1735-4587 | Iranian Journal of Psychiatry                                                     | ISLAMIC REPUBLIC OF IRAN |
| 166 | X                  | X                 | 1024-0047 | Iranian Journal of Psychiatry and Clinical Psychology (ANDEESHEH VA RAFTAR)       | ISLAMIC REPUBLIC OF IRAN |
| 167 | √                  | X                 | 0304-4556 | Iranian Journal of Public Health                                                  | ISLAMIC REPUBLIC OF IRAN |
| 168 | X                  | √                 | 1728-4554 | Iranian Journal of Radiation Research                                             | ISLAMIC REPUBLIC OF IRAN |
| 169 | X                  | X                 | 1735-1065 | Iranian Journal of Radiology                                                      | ISLAMIC REPUBLIC OF IRAN |
| 170 | X                  | X                 | N/A       | Iranian Journal of Reproductive Medicine                                          | ISLAMIC REPUBLIC OF IRAN |
| 171 | X                  | X                 | 1728-1997 | Iranian Journal of Veterinary Research                                            | ISLAMIC REPUBLIC OF IRAN |
| 172 | X                  | X                 | N/A       | Iranian Rehabilitation Journal                                                    | ISLAMIC REPUBLIC OF IRAN |
| 173 | X                  | X                 | N/A       | Iraqi Army Medical Journal                                                        | IRAQ                     |
| 174 | X                  | X                 | N/A       | Iraqi Journal of Agriculture                                                      | IRAQ                     |
| 175 | X                  | X                 | N/A       | Iraqi Journal of Biotechnology                                                    | IRAQ                     |
| 176 | X                  | X                 | 1684-5382 | Iraqi Journal of Community Medicine                                               | IRAQ                     |
| 177 | X                  | X                 | 1681-6579 | Iraqi Journal of Medical Sciences                                                 | IRAQ                     |
| 178 | X                  | X                 | N/A       | Iraqi Journal of Microbiology                                                     | IRAQ                     |
| 179 | X                  | X                 | N/A       | Iraqi Journal of Pharmaceutical Sciences                                          | IRAQ                     |
| 180 | X                  | X                 | 1814-0823 | Iraqi Journal of Tropical Disease Researches                                      | IRAQ                     |
| 181 | √                  | X                 | 1561-4395 | IRCMJ – Iranian Red Crescent Medical Journal                                      | UNITED ARAB EMIRATES     |
| 182 | √                  | X                 | 1025-9589 | JAMC - Journal of Ayub Medical College - Abbotabad - Pakistan                     | PAKISTAN                 |
| 183 | √                  | √                 | 1015-6321 | JBMS - Journal of the Bahrain Medical Society                                     | BAHRAIN                  |
| 184 | √                  | √                 | 1022-386X | JCPSP - Journal of the College of Physicians and Surgeons Pakistan                | PAKISTAN                 |
| 185 | X                  | X                 | 1735-2150 | JDT - Journal of Dentistry Tehran University of Medical Sciences                  | ISLAMIC REPUBLIC OF IRAN |
| 186 | X                  | X                 | N/A       | JDUHS - Journal of the Dow University of Health Sciences                          | PAKISTAN                 |
| 187 | X                  | X                 | 1303-667X | JISHIM - Journal of the International Society for the History of Islamic Medicine | SYRIAN ARAB REPUBLIC     |
| 188 | X                  | X                 | 1810-9632 | JLDA - Journal of the Lebanese Dental Association                                 | LEBANON                  |
| 189 | X                  | √                 | 1729-0341 | JLUMHS - Journal of the Liaquat University of Medical Health Sciences             | PAKISTAN                 |
| 190 | X                  | X                 | N/A       | JMJ - Jamahiriya Medical Journal                                                  | LYBIAN ARAB JAMAHIRIYA   |

| No  | INDEXED IN MEDLINE | INDEXED IN EMBASE | ISSN          | Journal Title                                                    | Country                  |
|-----|--------------------|-------------------|---------------|------------------------------------------------------------------|--------------------------|
| 191 | X                  | X                 | N/A           | JMJ - Juba Medical Journal                                       | SUDAN                    |
| 192 | X                  | X                 | 1728-1962     | JMR - Journal of Medical Research                                | ISLAMIC REPUBLIC OF IRAN |
| 193 | X                  | √                 | N/A 1011-4564 | JMS - Journal of Medical Sciences                                | PAKISTAN                 |
| 194 | X                  | X                 | N/A           | Joint Centre for Research in Prosthetics and Orthotics [The]     | SAUDI ARABIA             |
| 195 | X                  | X                 | N/A           | JOPDAK - Journal of the Pakistan Dental Association Karachi      | PAKISTAN                 |
| 196 | X                  | √                 | 0446-9283     | Jordan Medical Journal                                           | JORDAN                   |
| 197 | X                  | X                 | 1113-5667     | Journal du Practicien                                            | MOROCCO                  |
| 198 | X                  | X                 | N/A           | Journal of Arak University of Medical Sciences - Rahavard Danesh | ISLAMIC REPUBLIC OF IRAN |
| 199 | X                  | X                 | 1727-1789     | Journal of Army University of Medical Sciences – J.A.U.M.S       | ISLAMIC REPUBLIC OF IRAN |
| 200 | X                  | X                 | 1561-4107     | Journal of Babol University of Medical Sciences                  | ISLAMIC REPUBLIC OF IRAN |
| 201 | X                  | X                 | N/A           | Journal of Basic and Applied Sciences                            | PAKISTAN                 |
| 202 | √                  | X                 | 1608-6015     | Journal of Basic Medical Sciences                                | IRAQ                     |
| 203 | X                  | X                 | N/A           | Journal of Childhood Studies                                     | EGYPT                    |
| 204 | X                  | X                 | N/A           | Journal of Clinical Laboratory [The]                             | SYRIAN ARAB REPUBLIC     |
| 205 | X                  | X                 | N/A           | Journal of Community Medicine                                    | IRAQ                     |
| 206 | X                  | X                 | 1024-641X     | Journal of Dentistry - Tehran University of Medical Sciences     | ISLAMIC REPUBLIC OF IRAN |
| 207 | X                  | X                 | 1728-3426     | Journal of Dentistry, Shiraz University of Medical Sciences      | ISLAMIC REPUBLIC OF IRAN |
| 208 | X                  | X                 | 1812-7568     | Journal of Dohuk University                                      | IRAQ                     |
| 209 | √                  | X                 | 0085-2406     | Journal of Drug Research                                         | EGYPT                    |
| 210 | X                  | X                 | 1319-1683     | Journal of Family and Community Medicine                         | SAUDI ARABIA             |
| 211 | X                  | X                 | 1562-4765     | Journal of Gorgan University of Medical Sciences                 | ISLAMIC REPUBLIC OF IRAN |
| 212 | X                  | X                 | 1110-0796     | Journal of Hepatology, Gastroenterology and Infectious Diseases  | EGYPT                    |
| 213 | X                  | X                 | 1735-2363     | Journal of Hygiene and Health                                    | ISLAMIC REPUBLIC OF IRAN |
| 214 | X                  | X                 | 1735-255X     | Journal of Isfahan Dental School                                 | ISLAMIC REPUBLIC OF IRAN |
| 215 | X                  | X                 | 1027-7595     | Journal of Isfahan Medical School                                | ISLAMIC REPUBLIC OF IRAN |
| 216 | X                  | X                 | 1024-6428     | Journal of Islamic Dental Association of Iran [The]              | ISLAMIC REPUBLIC OF IRAN |
| 217 | X                  | X                 | 1813-0410     | Journal of Karbala University                                    | IRAQ                     |
| 218 | X                  | X                 | 1023-9510     | Journal of Kerman University of Medical Sciences                 | ISLAMIC REPUBLIC OF IRAN |

| No  | INDEXED IN MEDLINE | INDEXED IN EMBASE | ISSN             | Journal Title                                                                       | Country                  |
|-----|--------------------|-------------------|------------------|-------------------------------------------------------------------------------------|--------------------------|
| 219 | X                  | X                 | 1319-1004        | Journal of King Abdulaziz University - Medical Sciences                             | SAUDI ARABIA             |
| 220 | X                  | X                 | 1110-6468        | Journal of Legal Medicine and Forensic Sciences[The]                                | EGYPT                    |
| 221 | X                  | X                 | 1560-9286        | Journal of Mashad Dental School                                                     | ISLAMIC REPUBLIC OF IRAN |
| 222 | X                  | X                 | 1561-4123        | Journal of Mazandaran University of Medical Sciences                                | ISLAMIC REPUBLIC OF IRAN |
| 223 | X                  | X                 | 1562-1073        | Journal of Medical Council of Islamic Republic of Iran                              | ISLAMIC REPUBLIC OF IRAN |
| 224 | X                  | X                 | N/A              | Journal of Medical Education                                                        | ISLAMIC REPUBLIC OF IRAN |
| 225 | X                  | √                 | 1682-4474        | Journal of Medical Sciences                                                         | PAKISTAN                 |
| 226 | X                  | √                 | 1684-0240        | Journal of Medicinal Plants                                                         | ISLAMIC REPUBLIC OF IRAN |
| 227 | X                  | √                 | N/A<br>1606-9331 | Journal of Nephrology Urology and Transplantation                                   | PAKISTAN                 |
| 228 | X                  | X                 | 1561-3666        | Journal of Qazvin University of Medical Sciences and Health Services [The]          | ISLAMIC REPUBLIC OF IRAN |
| 229 | X                  | X                 | 1562-272X        | Journal of Shaheed Sadoughi University of Medical Sciences and Health Services      | ISLAMIC REPUBLIC OF IRAN |
| 230 | X                  | X                 | 1735-1448        | Journal of Shahrekord University of Medical Sciences                                | ISLAMIC REPUBLIC OF IRAN |
| 231 | X                  | X                 | 1681-4517        | Journal of Surgery [The]                                                            | PAKISTAN                 |
| 232 | X                  | X                 | 1735-5370        | Journal of Tehran Heart Center [The]                                                | ISLAMIC REPUBLIC OF IRAN |
| 233 | X                  | X                 | 1561-0217        | Journal of the Arab Board of Medical Specializations                                | SYRIAN ARAB REPUBLIC     |
| 234 | X                  | X                 | N/A              | Journal of the Arab Dentist                                                         | SYRIAN ARAB REPUBLIC     |
| 235 | X                  | X                 | 1812-1756        | Journal of the Arab Neonatology Forum                                               | LEBANON                  |
| 236 | √                  | X                 | 1687-4293        | Journal of the Arab Society for Medical Research                                    | EGYPT                    |
| 237 | X                  | X                 | N/A              | Journal of the College of Dentistry - Baghdad                                       | IRAQ                     |
| 238 | X                  | X                 | N/A              | Journal of the Dental School - Shahid Beheshti Medical Sciences University -        | ISLAMIC REPUBLIC OF IRAN |
| 239 | √                  | X                 | 0013-2411        | Journal of the Egyptian Medical Association [The]                                   | EGYPT                    |
| 240 | √                  | X                 | 1110-0362        | Journal of the Egyptian National Cancer Institute                                   | EGYPT                    |
| 241 | √                  | X                 | N/A              | Journal of the Egyptian Public Health Association [The]                             | EGYPT                    |
| 242 | X                  | X                 | N/A              | Journal of the Egyptian Society of Endocrinology, Metabolism and Diabetes [The]     | EGYPT                    |
| 243 | √                  | X                 | 0258-3216        | Journal of the Egyptian Society of Obstetrics and Gynecology [The]                  | EGYPT                    |
| 244 | √                  | X                 | 1110-0583        | Journal of the Egyptian Society of Parasitology                                     | EGYPT                    |
| 245 | X                  | X                 | N/A              | Journal of the Egyptian Society of Pharmacology and Experimental Therapeutics [The] | EGYPT                    |
| 246 | X                  | X                 | 1110-127X        | Journal of the Egyptian Society of Toxicology                                       | EGYPT                    |
| 247 | √                  | X                 | 0041-9419        | Journal of the Faculty of Medicine - Baghdad                                        | IRAQ                     |

| No  | INDEXED IN MEDLINE | INDEXED IN EMBASE | ISSN      | Journal Title                                                                                            | Country                  |
|-----|--------------------|-------------------|-----------|----------------------------------------------------------------------------------------------------------|--------------------------|
| 248 | X                  | X                 | N/A       | Journal of the Faculty of Medicine - Shaheed Beheshti University of Medical Sciences and Health Services | ISLAMIC REPUBLIC OF IRAN |
| 249 | X                  | X                 | 1022-646X | Journal of the Faculty of Veterinary Medicine - University of Tehran                                     | ISLAMIC REPUBLIC OF IRAN |
| 250 | X                  | X                 | 1110-0133 | Journal of the Medical research Institute - Alexandria University                                        | EGYPT                    |
| 251 | X                  | X                 | N/A       | Journal of the Royal Medical Services                                                                    | JORDAN                   |
| 252 | X                  | X                 | 1319-9218 | Journal of the Saudi Heart Association                                                                   | SAUDI ARABIA             |
| 253 | X                  | X                 | N/A       | Journal of Tropical Nephro-Urology                                                                       | YEMEN                    |
| 254 | X                  | X                 | 1606-9366 | Journal of Zanjan University of Medical Sciences and Health Services                                     | ISLAMIC REPUBLIC OF IRAN |
| 255 | X                  | √                 | 1560-9014 | JPAD - Journal of Pakistan Association of Dermatologists                                                 | PAKISTAN                 |
| 256 | X                  | X                 | N/A       | JPC - Journal of Pediatric Club                                                                          | EGYPT                    |
| 257 | X                  | X                 | 1680-2292 | JPDA - Journal of the Pakistan Dental Association                                                        | PAKISTAN                 |
| 258 | X                  | X                 | 1683-6928 | JPIMS - Journal of Pakistan Institute of Medical Sciences                                                | PAKISTAN                 |
| 259 | √                  | √                 | 0030-9982 | JPMA - Journal of Pakistan Medical Association                                                           | PAKISTAN                 |
| 260 | X                  | √                 | 1013-5472 | JPMI - Journal of Postgraduate Medicales Institute                                                       | PAKISTAN                 |
| 261 | √                  | X                 | 1726-8710 | JPPS - Journal of Pakistan Psychiatric Society                                                           | PAKISTAN                 |
| 262 | X                  | √                 | 1735-1995 | JRMS - Journal of Research in Medical Sciences                                                           | ISLAMIC REPUBLIC OF IRAN |
| 263 | X                  | X                 | 1817-0242 | JSP - Journal of Surgery Pakistan International                                                          | PAKISTAN                 |
| 264 | X                  | X                 | N/A       | Kasr El Aini Journal of Surgery                                                                          | EGYPT                    |
| 265 | X                  | X                 | N/A       | Khartoum Pharmacy Journal                                                                                | SUDAN                    |
| 266 | X                  | X                 | 1369-3050 | Kidney Forum                                                                                             | EGYPT                    |
| 267 | √                  | X                 | 0023-5776 | KMJ - Kuwait Medical Journal                                                                             | KUWAIT                   |
| 268 | X                  | √                 | 1608-7046 | KOOMESH - Journal of the Samman University of Medical Sciences                                           | ISLAMIC REPUBLIC OF IRAN |
| 269 | X                  | X                 | N/A       | Kufa Medical Journal                                                                                     | IRAQ                     |
| 270 | X                  | X                 | N/A       | Lahore Journal of Public Health                                                                          | PAKISTAN                 |
| 271 | X                  | X                 | 1561-3410 | Lebanese Science Journal                                                                                 | LEBANON                  |
| 272 | X                  | X                 | N/A       | Libyan Journal of Infectious Diseases [The]                                                              | LIBYAN ARAB JAMAHIRYA    |
| 273 | X                  | X                 | 1819-6357 | LJM - Libyan Journal of Medicine                                                                         | LIBYAN ARAB JAMAHIRYA    |
| 274 | √                  | X                 | 0023-9852 | LMJ - Lebanese Medical Journal                                                                           | LEBANON                  |
| 275 | √                  | X                 | 0330-258X | Maghreb Medical                                                                                          | TUNISIA                  |

| No  | INDEXED IN MEDLINE | INDEXED IN EMBASE | ISSN             | Journal Title                                                         | Country                  |
|-----|--------------------|-------------------|------------------|-----------------------------------------------------------------------|--------------------------|
| 276 | X                  | X                 | 1110-1318        | Mansoura Journal of Pharmaceutical Sciences                           | EGYPT                    |
| 277 | X                  | X                 | 1110-211X        | Mansoura Medical Journal                                              | EGYPT                    |
| 278 | √                  | X                 | 0025-4053        | Maroc Medical                                                         | MOROCCO                  |
| 279 | X                  | X                 | N/A              | Medical Arabization                                                   | KUWAIT                   |
| 280 | X                  | X                 | 1681-5491        | Medical Channel                                                       | PAKISTAN                 |
| 281 | X                  | √                 | 1029-385X        | Medical Forum                                                         | PAKISTAN                 |
| 282 | X                  | X                 | N/A              | Medical Journal of Ahmed Maher Teaching Hospital [The]                | EGYPT                    |
| 283 | X                  | X                 | 0253-0759        | Medical Journal of Basrah University [The]                            | IRAQ                     |
| 284 | √                  | X                 | 0045-3803        | Medical Journal of Cairo University [The]                             | EGYPT                    |
| 285 | X                  | X                 | 1016-3360        | Medical Journal of Islamic World Academy of Sciences                  | JORDAN                   |
| 286 | X                  | X                 | N/A              | Medical Journal of Mashad University of Medical Sciences              | ISLAMIC REPUBLIC OF IRAN |
| 287 | X                  | X                 | 1726-7536        | Medical Journal of Reproduction and Infertility                       | ISLAMIC REPUBLIC OF IRAN |
| 288 | X                  | X                 | 1110-2039        | Medical Journal of Teaching Hospitals and Institutes [The]            | EGYPT                    |
| 289 | √                  | X                 | 1016-1430        | Medical Journal of the Islamic Republic of Iran                       | ISLAMIC REPUBLIC OF IRAN |
| 290 | X                  | X                 | N/A              | Medical Journal of Tikrit University [The]                            | IRAQ                     |
| 291 | √                  | √                 | 1011-7571        | Medical Principles and Practice                                       | KUWAIT                   |
| 292 | X                  | X                 | 1023-5922        | Medical Sciences Journal of Islamic Azad University                   | ISLAMIC REPUBLIC OF IRAN |
| 293 | X                  | X                 | 0254-8534        | Medical Spectrum [The]                                                | PAKISTAN                 |
| 294 | X                  | X                 | 1813-9876        | Medicine Today                                                        | PAKISTAN                 |
| 295 | X                  | X                 | N/A              | MEJO - Middle East Journal of Ophthalmolgy                            | SAUDI ARABIA             |
| 296 | √                  | X                 | 0544-0440        | Middle East Journal of Anesthesiology                                 | LEBANON                  |
| 297 | X                  | √                 | N/A<br>1729-6455 | Middle East Journal of Emergency Medicine [The]                       | QATAR                    |
| 298 | X                  | X                 | N/A              | Middle East Journal of Family Medicine                                | LEBANON                  |
| 299 | X                  | X                 | 1110-2098        | Minoufiya Medical Journal                                             | EGYPT                    |
| 300 | X                  | X                 | 1110-5437        | MJFCT - Mansoura Journal of Forensic Medicine and Clinical Toxicology | EGYPT                    |
| 301 | X                  | X                 | 0379-2617        | Mother and Child                                                      | PAKISTAN                 |
| 302 | √                  | √                 | 0027-8874        | National Cancer Institute Journal                                     | EGYPT                    |
| 303 | X                  | X                 | 1687-0492        | Neonatology                                                           | EGYPT                    |

| No  | INDEXED IN MEDLINE | INDEXED IN EMBASE | ISSN      | Journal Title                                                       | Country                  |
|-----|--------------------|-------------------|-----------|---------------------------------------------------------------------|--------------------------|
| 304 | X                  | √                 | 1319-6138 | Neurosciences                                                       | SAUDI ARABIA             |
| 305 | √                  | X                 | 1110-1946 | New Egyptian Journal of Medicine [The]                              | EGYPT                    |
| 306 | X                  | X                 | 1917-5562 | New Iraqi Journal of Medicine [The]                                 | IRAQ                     |
| 307 | X                  | X                 | 1753-5001 | Nursing and Midwifery Research                                      | ISLAMIC REPUBLIC OF IRAN |
| 308 | X                  | X                 | N/A       | Oman Medical Journal                                                | OMAN                     |
| 309 | X                  | X                 | N/A       | Omdurman Journal of Pharmaceutical Sciences                         | SUDAN                    |
| 310 | X                  | X                 | 0030-9648 | PAFMJ - Pakistan Armed Forces Medical Journal                       | PAKISTAN                 |
| 311 | X                  | X                 | 0048-2706 | Pakistan Heart Journal                                              | PAKISTAN                 |
| 312 | X                  | X                 | N/A       | Pakistan Journal of Medical and Health Services                     | PAKISTAN                 |
| 313 | X                  | X                 | 0300-8185 | Pakistan Journal of Biochemistry                                    | PAKISTAN                 |
| 314 | X                  | X                 | N/A       | Pakistan Journal of Chest Medicine                                  | PAKISTAN                 |
| 315 | X                  | X                 | 1019-438X | Pakistan Journal of Clinical Psychology                             | PAKISTAN                 |
| 316 | X                  | X                 | N/A       | Pakistan Journal of Community Medicine [The]                        | PAKISTAN                 |
| 317 | √                  | X                 | N/A       | Pakistan Journal of Health                                          | PAKISTAN                 |
| 318 | X                  | √                 | 1682-024X | Pakistan Journal of Medical Sciences                                | PAKISTAN                 |
| 319 | X                  | X                 | N/A       | Pakistan Journal of Neurology                                       | PAKISTAN                 |
| 320 | X                  | X                 | N/A       | Pakistan Journal of Obstetrics and Gynaecology                      | PAKISTAN                 |
| 321 | X                  | X                 | 1608-134X | Pakistan Journal of Orthodontics, Pediatric and Community Dentistry | PAKISTAN                 |
| 322 | X                  | X                 | 0257-4985 | Pakistan Journal of Otolaryngology - Head and Neck Surgery          | PAKISTAN                 |
| 323 | X                  | X                 | N/A       | Pakistan Journal of Pathology                                       | PAKISTAN                 |
| 324 | √                  | X                 | 1011-601X | Pakistan Journal of Pharmaceutical Sciences                         | PAKISTAN                 |
| 325 | X                  | X                 | 0255-7088 | Pakistan Journal of Pharmacology                                    | PAKISTAN                 |
| 326 | X                  | X                 | 1819-270X | Pakistan Journal of Physiology                                      | PAKISTAN                 |
| 327 | √                  | X                 | 0030-9869 | Pakistan Journal of Psychology                                      | PAKISTAN                 |
| 328 | √                  | X                 | 0030-9885 | Pakistan Journal of Scientific and Industrial Research              | PAKISTAN                 |
| 329 | X                  | X                 | 0031-000X | Pakistan Medical Journal                                            | PAKISTAN                 |
| 330 | X                  | X                 | 0259-3661 | Pakistan Ophthalmology                                              | PAKISTAN                 |

| No  | INDEXED IN MEDLINE | INDEXED IN EMBASE | ISSN      | Journal Title                                                       | Country                  |
|-----|--------------------|-------------------|-----------|---------------------------------------------------------------------|--------------------------|
| 331 | X                  | X                 | 1012-8700 | Pakistan Oral and Dental Journal                                    | PAKISTAN                 |
| 332 | √                  | X                 | 0304-4904 | Pakistan Pediatric Journal                                          | PAKISTAN                 |
| 333 | X                  | √                 | 1319-6995 | Pan Arab Journal of Neurosurgery                                    | SAUDI ARABIA             |
| 334 | X                  | X                 | 1607-4912 | Pan Arab Journal of Orthopaedic and Trauma                          | EGYPT                    |
| 335 | X                  | X                 | N/A       | Pan Arab Medical Journal                                            | JORDAN                   |
| 336 | X                  | X                 | 1735-1022 | Pejouhandeh: Bimonthly Research Journal                             | ISLAMIC REPUBLIC OF IRAN |
| 337 | X                  | X                 | 1016-1244 | PJC - Pakistan Journal of Cardiology                                | PAKISTAN                 |
| 338 | √                  | X                 | 0030-9842 | PJMR - Pakistan Journal of Medical Research                         | PAKISTAN                 |
| 339 | X                  | X                 | 0258-8552 | PJS - Pakistan Journal of Surgery                                   | PAKISTAN                 |
| 340 | X                  | X                 | N/A       | PMJ - Palestinian Medical Journal                                   | PALESTIN                 |
| 341 | √                  | X                 | 0258-1914 | Population Bulletin of ESCWA                                        | IRAQ                     |
| 342 | X                  | X                 | N/A       | Population Researches and Studies                                   | EGYPT                    |
| 343 | √                  | X                 | N/A       | Population Sciences                                                 | EGYPT                    |
| 344 | X                  | X                 | 1110-1342 | Population Studies                                                  | EGYPT                    |
| 345 | X                  | X                 | N/A       | Proceedings                                                         | PAKISTAN                 |
| 346 | X                  | X                 | 1024-8919 | Professional Medical Journal - Quarterly [The]                      | PAKISTAN                 |
| 347 | X                  | √                 | 0253-8253 | Qatar Medical Journal                                               | QATAR                    |
| 348 | X                  | X                 | 1028-6918 | Quarterly Journal of Fundamentals of Mental Health [The]            | ISLAMIC REPUBLIC OF IRAN |
| 349 | X                  | X                 | N/A       | Rehabilitation International                                        | SAUDI ARABIA             |
| 350 | X                  | X                 | 1019-5335 | Research Centre Bulletin                                            | SAUDI ARABIA             |
| 351 | X                  | X                 | N/A       | Research Journal of Aleppo University - Medical Sciences Series     | SYRIAN ARAB REPUBLIC     |
| 352 | X                  | X                 | 0330-7611 | Revue Maghrebine de Pediatrie [La]                                  | TUNISIA                  |
| 353 | X                  | X                 | N/A       | Revue Maghrebine d'Endocrinologie - Diabete et de Reproduction [La] | TUNISIA                  |
| 354 | X                  | X                 | N/A       | Revue Marocaine de Chirurgie Orthopedique et Traumatologique        | MOROCCO                  |
| 355 | X                  | X                 | 0251-0758 | Revue Marocaine de Medecine et de Sante                             | MOROCCO                  |
| 356 | X                  | X                 | N/A       | Revue Marocaine des Maladies de L'Enfant                            | MOROCCO                  |
| 357 | X                  | X                 | N/A       | Risafa Medical Journal                                              | IRAQ                     |

| No  | INDEXED IN MEDLINE | INDEXED IN EMBASE | ISSN      | Journal Title                                                                         | Country                  |
|-----|--------------------|-------------------|-----------|---------------------------------------------------------------------------------------|--------------------------|
| 358 | X                  | X                 | 0303-5212 | RMJ - Rawal Medical Journal                                                           | PAKISTAN                 |
| 359 | X                  | X                 | N/A       | Salmand: Iranian Journal of Aging                                                     | ISLAMIC REPUBLIC OF IRAN |
| 360 | X                  | X                 | N/A       | Sana'a University Medical Journal                                                     | YEMEN                    |
| 361 | X                  | X                 | 1319-3965 | Saudi Epidemiology Bulletin                                                           | SAUDI ARABIA             |
| 362 | X                  | X                 | 1018-077X | Saudi Heart Journal                                                                   | SAUDI ARABIA             |
| 363 | X                  | X                 | 1319-6499 | Saudi Journal of Disability and Rehabilitation                                        | SAUDI ARABIA             |
| 364 | X                  | X                 | 1319-3767 | Saudi Journal of Gastroenterology [The]                                               | SAUDI ARABIA             |
| 365 | X                  | X                 | 1319-4534 | Saudi Journal of Ophthalmology                                                        | SAUDI ARABIA             |
| 366 | X                  | X                 | 1319-8491 | Saudi Journal of Oto-Rhino-Laryngology Head and Neck Surgery [The]                    | SAUDI ARABIA             |
| 367 | X                  | X                 | 1319-6308 | Saudi Journal of Sports Medicine [The]                                                | SAUDI ARABIA             |
| 368 | √                  | √                 | 0379-5284 | Saudi Medical Journal                                                                 | SAUDI ARABIA             |
| 369 | X                  | X                 | 1110-2381 | Scientific Journal of Al-Azhar Medical Faculty [Girls] [The]                          | EGYPT                    |
| 370 | X                  | X                 | 1027-1457 | Scientific Journal of Forensic Medicine                                               | ISLAMIC REPUBLIC OF IRAN |
| 371 | X                  | X                 | 1560-652X | Scientific Journal of Kurdistan University of Medical Sciences                        | ISLAMIC REPUBLIC OF IRAN |
| 372 | X                  | X                 | 1735-7586 | Scientific Journal of School of Public Health and Institute of Public Health Research | ISLAMIC REPUBLIC OF IRAN |
| 373 | X                  | X                 | 1110-5607 | Scientific Medical Journal                                                            | EGYPT                    |
| 374 | X                  | X                 | N/A       | Scientific Nursing Journal                                                            | IRAQ                     |
| 375 | X                  | X                 | 1013-9052 | SDJ - Saudi Dental Journal [The]                                                      | SAUDI ARABIA             |
| 376 | X                  | X                 | 1605-8941 | Shaheed Beheshti Uneversity of Medical Sciences and Health Services                   | ISLAMIC REPUBLIC OF IRAN |
| 377 | X                  | X                 | N/A       | Social Welfare Quarterly                                                              | ISLAMIC REPUBLIC OF IRAN |
| 378 | X                  | X                 | 1110-7529 | South Valley Medical Journal                                                          | EGYPT                    |
| 379 | X                  | √                 | 1319-0164 | SPJ - Saudi Pharmaceutical Journal                                                    | SAUDI ARABIA             |
| 380 | X                  | X                 | 1029-4066 | SQUMJ - Sultan Qaboos University Medical Journal                                      | OMAN                     |
| 381 | X                  | X                 | N/A       | SST - Sante et Securite au Travail                                                    | TUNISIA                  |
| 382 | X                  | X                 | 1735-4242 | Strides in Development of Medical Education                                           | ISLAMIC REPUBLIC OF IRAN |
| 383 | √                  | X                 | N/A       | Sudan Journal of Medical Sciences                                                     | SUDAN                    |
| 384 | √                  | X                 | 0491-4481 | Sudan Medical Journal                                                                 | SUDAN                    |

| No  | INDEXED IN MEDLINE | INDEXED IN EMBASE | ISSN      | Journal Title                                              | Country                  |
|-----|--------------------|-------------------|-----------|------------------------------------------------------------|--------------------------|
| 385 | X                  | X                 | 1585-5000 | Sudan Medical Monitor                                      | SUDAN                    |
| 386 | X                  | X                 | N/A       | Sudanese Journal of Dermatology                            | SUDAN                    |
| 387 | X                  | X                 | N/A       | Sudanese Journal of Public Health                          | SUDAN                    |
| 388 | X                  | X                 | 1110-6999 | Suez Canal University Medical Journal                      | EGYPT                    |
| 389 | X                  | X                 | N/A       | Tabib Attifil Alarabi                                      | LYBIAN ARAB JAMAHIRIYA   |
| 390 | X                  | X                 | 1735-0344 | Tanaffos                                                   | ISLAMIC REPUBLIC OF IRAN |
| 391 | X                  | X                 | 1110-1415 | Tanta Medical Journal                                      | EGYPT                    |
| 392 | X                  | X                 | 1687-5788 | Tanta Medical Sciences Journal                             | EGYPT                    |
| 393 | X                  | X                 | N/A       | Tehran University Medical Journal [TUMJ]                   | ISLAMIC REPUBLIC OF IRAN |
| 394 | X                  | X                 | 1728-5127 | Toloo-e-Behdasht                                           | ISLAMIC REPUBLIC OF IRAN |
| 395 | √                  | √                 | 0041-4131 | Tunisie Medicale [La]                                      | TUNISIA                  |
| 396 | X                  | X                 | 1606-8947 | University of Aden Journal of Natural and Applied Sciences | YEMEN                    |
| 397 | √                  | X                 | 1735-1308 | Urology Journal                                            | ISLAMIC REPUBLIC OF IRAN |
| 398 | X                  | X                 | 1110-1423 | Veterinary Medical Journal                                 | EGYPT                    |
| 399 | X                  | √                 | 1561-4921 | Yakhteh Medical Journal                                    | ISLAMIC REPUBLIC OF IRAN |
| 400 | X                  | X                 | N/A       | Yemeni Journal for Medical Sciences [The]                  | YEMEN                    |
| 401 | X                  | X                 | N/A       | YHMRJ - Yemeni Health and Medical Research Journal         | YEMEN                    |
| 402 | X                  | X                 | N/A       | YJMHR-Yemeni Journal of Medical and Health Research        | YEMEN                    |
| 403 | X                  | X                 | N/A       | YMJ - Yemen Medical Journal                                | YEMEN                    |
| 404 | X                  | X                 | N/A       | Zagazig Journal of Forensic Medicine and Toxicology        | EGYPT                    |
| 405 | X                  | X                 | 1110-5089 | Zagazig Journal of Pharmaceutical Sciences                 | EGYPT                    |
| 406 | X                  | X                 | 1110-2322 | Zagazig Medical Association Journal                        | EGYPT                    |
| 407 | X                  | X                 | 1110-1431 | Zagazig University Medical Journal                         | EGYPT                    |
| 408 | X                  | X                 | N/A       | Zanco Journal for Medical Sciences                         | IRAQ                     |
